# Supplementary material for: Genome-Wide Association Studies of the Human Gut Microbiota
Source: PLoS One. 2015 Nov 3;10(11):e0140301. doi: 10.1371/journal.pone.0140301 (PMC4631601; doi:10.1371/journal.pone.0140301)
Supplement: S4 Table — This table contains P-values representing the significance of enrichment of GWAS SNPs overlapping DHS peaks in each of the 16 tissues examined in the lowest GWAS p-value bin tested for each bacterial taxon. (XLSX) [file pone.0140301.s013.xlsx]

## Sheet: README
Table S4: Candidate tissue p-values
This table contains p-values representing the significance of enrichment of GWAS SNPs overlapping DHS peaks in each of the 16 tissues examined in the lowest GWAS p-value bin tested for each bacterial taxon. A null distribution of enrichments was generated by permutation of bacterial abundances across individuals (10,000 permutations), GWAS of those permuted phenotypes, and finally, enrichment cal…

## Sheet: winter
	Adrenal	Brain	Cancer	Endothelial	Heart	Intestine	Kidney	Lung	Lymphoid	Muscle	Myeloid	Placenta	Skin	StemCell	Stomach	Thymus
family_Neisseriaceae	0.850185	0.69927	1	1	0.914091	1	1	0.19912	1	0.0920092	0.385239	0.493349	1	0.218022	0.70077	0.341334
family_Pasteurellaceae	0.486049	0.00140014	1	0.478348	0.368237	0.279728	0.507951	0.358436	1	0.0175018	1	0.360836	0.127113	0.166017	0.271727	0.265427
family_Succinivibrionaceae	0.209421	0.60406	1	0.451545	0.155616	0.60136	1	1	1	0.712671	1	0.756376	1	0.146615	1	0.591259
genus_Acinetobacter	0.452845	0.608961	1	0.456746	0.851485	0.606561	0.151315	0.333333	0.19922	0.146015	0.314931	0.765077	1	0.485949	0.249825	0.59726
genus_Bifidobacterium	1	0.30033	1	1	0.657366	1	0.531153	0.389139	1	0.428843	1	0.826983	1	1	0.29823	1
genus_Butyricicoccus	0.188019	0.584158	1	1	0.831283	0.582058	0.466647	1	1	1	1	0.280228	1	1	0.586159	1
genus_Chryseobacterium	1	1	1	1	0.630263	1	1	1	1	0.487349	1	0.192019	1	1	1	1
genus_Coprococcus	1	1	1	1	1	1	1	1	1	1	1	0.675168	1	1	1	0.311931
genus_Corynebacterium	0.115912	0.0394039	0.0565057	0.0160016	0.0744074	0.0410041	0.00350035	0.0635064	0.146815	0.245025	0.239824	0.0281028	0.0887089	0.0932093	0.00090009	0.481448
genus_Fusobacterium	1	0.0813081	1	1	1	1	1	0.115112	1	0.455946	1	1	1	1	1	1
genus_Holdemania	0.757376	1	1	1	0.311531	1	1	1	1	1	1	0.739974	1	1	1	1
genus_Lachnobacterium	0.158816	1	1	1	0.580658	1	1	1	1	1	1	0.147015	1	1	1	1
genus_Lactobacillus	0.232223	0.625563	1	1	1	0.620762	0.50245	0.694969	1	1	1	0.348035	1	1	1	0.611761
genus_Olsenella	0.646365	1	1	1	1	0.478148	1	1	1	1	1	0.851985	1	1	1	0.463046
order_Burkholderiales	0.30313	1	1	1	0.738074	0.481648	0.375738	1	1	0.592759	0.232323	0.150815	1	0.373837	0.484348	0.145415
family_Clostridiaceae	0.188019	0.584158	0.0729073	0.433743	0.831283	0.582058	0.466647	0.308131	0.186819	0.694569	0.29793	0.491449	0.112911	0.134213	0.586159	0.571457
family_Erysipelotrichaceae	0.237724	1	1	1	0.182618	1	0.505851	0.69937	1	0.737574	1	0.791579	1	1	1	0.263126
genus_Allisonella	0.707471	0.0508051	1	1	0.788379	1	0.109311	0.611461	1	0.649465	1	0.0163016	1	0.418342	1	1
genus_Barnesiella	0.605361	0.144514	1	0.557956	0.50175	0.368637	0.584858	0.461546	0.259626	0.813581	0.39584	0.10301	1	1	0.363736	0.70277
genus_Enterococcus	0.326733	1	1	1	0.208021	0.50375	1	1	1	1	0.244624	0.00170017	1	1	0.508151	1
genus_Streptococcus	0.309131	0.688769	0.0966097	0.534553	0.70147	0.686669	0.563356	0.428343	0.244124	0.792279	1	0.860286	0.149515	0.209921	0.690469	0.679968
genus_Veillonella	0.490549	0.343934	1	0.244124	0.236824	0.341134	1	0.409941	1	0.440144	1	0.359036	1	1	1	1
order_Oceanospirillales	1	0.339034	1	1	1	1	1	1	1	1	1	1	1	1	1	1

## Sheet: summer
	Adrenal	Brain	Cancer	Endothelial	Heart	Intestine	Kidney	Lung	Lymphoid	Muscle	Myeloid	Placenta	Skin	StemCell	Stomach	Thymus
family_Carnobacteriaceae	1	1	1	0.1989	0.4996	1	1	0.4514	1	0.0372	1	0.7293	1	1	1	1
family_Enterobacteriaceae	0.8031	1	1	0.1473	0.6328	1	1	1	1	0.7418	0.3366	0.9508	1	1	1	1
genus_Abiotrophia	0.538	1	1	1	0.6719	0.0337	0.5375	0.3921	1	0.0764	1	0.8421	1	1	0.6648	0.6508
genus_Anaerostipes	0.465	1	1	1	1	0.328	1	1	1	1	1	1	1	1	0.3289	1
genus_Anaerotruncus	0.7707	1	1	1	0.5843	1	1	1	1	1	1	1	1	1	1	1
genus_Bifidobacterium	1	1	1	1	0.2334	0.3456	1	1	0.09	1	1	0.7128	1	1	1	0.3358
genus_Desulfovibrio	0.5234	1	1	1	0.6149	1	1	1	1	1	1	0.7514	1	1	1	1
genus_Eubacterium	0.2281	0.2675	1	1	0.6211	0.6345	0.501	0.6986	0.2027	0.7339	0.3302	0.2151	1	0.1675	0.6292	0.6121
genus_Lactococcus	0.6353	1	1	1	0.7245	0.469	0.3507	0.5313	1	1	1	0.3167	1	0.364	0.4687	1
genus_Olsenella	0.8069	0.6374	1	0.0345	0.6382	0.647	0.5125	1	1	1	1	0.8151	1	1	1	0.6244
genus_Phascolarctobacterium	0.378	0.3947	1	1	0.9381	0.3987	1	0.798	0.2626	0.8311	1	0.0697	1	1	0.399	0.3727
genus_Sporacetigenium	0.7833	0.2553	1	0.4533	0.0728	0.6208	0.0359	0.1222	0.0243	0.1552	0.3202	0.5598	0.1221	0.4976	0.0836	0.0188
order_Rhizobiales	0.4925	0.6304	1	0.4709	0.8741	0.6398	1	0.3526	1	0.7385	1	0.8056	1	0.041	0.634	1
order_Selenomonadales	1	1	1	1	1	1	1	1	1	1	1	0.6604	1	1	1	1
class_Gammaproteobacteria	0.5234	1	1	0.2581	1	0.3733	1	0.4325	1	0.4709	1	0.7514	1	1	1	1
family_Peptostreptococcaceae	0.8457	0.6846	1	1	0.7028	1	1	0.7522	1	0.7878	1	0.6907	1	1	1	1
genus_Acetivibrio	0.6964	0.044	1	1	0.4743	0.0498	0.4064	0.07	1	0.6341	0.2594	0.8909	1	1	0.011	1
genus_Anaerofilum	0.5178	0.6464	1	0.4868	0.8871	0.2936	0.1755	0.7193	1	0.1861	0.3464	0.2456	1	0.1841	0.2967	0.2798
genus_Barnesiella	0.2071	0.6038	1	0.1328	0.8537	0.6128	1	0.3234	1	0.3646	1	0.0145	1	1	0.6073	0.5921
genus_Clostridium	0.4082	0.567	1	0.1133	0.2874	1	1	0.2848	0.174	0.3229	1	0.2803	1	0.4569	1	0.2088
genus_Coprobacillus	0.6808	0.7598	1	0.5923	0.949	0.4329	1	0.8206	0.28	0.148	1	0.6421	1	1	0.4325	0.4058
order_Desulfovibrionales	1	1	1	1	0.7501	1	1	1	1	1	1	0.6146	1	0.091	1	1

## Sheet: seasons_combined
	Adrenal	Brain	Cancer	Endothelial	Heart	Intestine	Kidney	Lung	Lymphoid	Muscle	Myeloid	Placenta	Skin	StemCell	Stomach	Thymus
genus_Akkermansia	0.147015	0.19842	1	0.0181018	0.492249	1	0.420242	0.0825083	1	0.29613	0.274227	0.113011	1	0.113211	0.544454	0.187919
genus_Anaerofilum	0.724772	0.555156	1	1	0.263026	0.548055	1	0.625563	1	1	1	0.70347	1	0.118312	0.553955	0.542554
genus_Anaerostipes	1	1	1	1	0.70387	1	1	1	1	0.552155	1	0.831583	1	1	1	0.438544
genus_Faecalibacterium	0.693969	0.522452	1	0.0926093	0.0894089	0.00220022	1	0.070407	0.159716	0.625263	1	0.211821	1	1	0.0472047	0.510351
genus_Lachnobacterium	1	0.324932	1	1	1	1	1	1	1	1	1	1	1	1	1	1
genus_Megasphaera	1	0.558956	1	1	1	0.551255	1	1	1	0.307831	1	0.706971	1	0.432843	0.557056	1
genus_Mitsuokella	1	1	1	0.39514	0.484848	0.533253	1	0.607461	1	1	1	1	1	1	1	1
order_Selenomonadales	0.813181	1	1	0.494749	1	1	1	1	1	1	1	0.410841	1	0.521452	0.647765	1
class_Gammaproteobacteria	0.854985	1	1	1	1	0.694469	1	1	1	0.232823	1	0.50335	1	1	1	0.686169
family_Campylobacteraceae	0.633863	0.465447	1	1	0.382738	0.462746	1	1	1	0.214421	0.221422	0.308631	1	1	0.464046	0.133813
family_Erysipelotrichaceae	1	0.232623	1	1	0.840684	0.582858	1	0.662866	1	1	1	0.517352	1	0.139014	0.587259	0.577058
family_Lachnospiraceae	0.535254	0.666867	1	1	0.671567	1	1	0.741674	1	0.770777	1	0.843984	1	1	1	1
family_Neisseriaceae	0.129013	0.182518	0.0608061	0.0156016	0.029603	0.049705	0.0182018	0.070407	0.159716	0.0907091	0.0060006	0.0136014	0.00550055	0.0177018	0.0472047	0.00960096
family_Pasteurellaceae	0.0376038	0.172417	1	0.0139014	0.0250025	0.173017	0.0158016	0.0657066	1	0.0842084	0.0381038	0.0862086	1	1	0.00130013	0.49755
genus_Barnesiella	1	0.308931	1	1	1	1	1	1	1	1	1	1	1	1	1	1
genus_Coprococcus	0.467947	1	1	1	1	1	1	0.0418042	1	0.163216	1	0.941794	1	1	0.623462	0.611461
genus_Dolosigranulum	0.687269	0.436944	1	0.253225	0.110311	0.442844	0.630363	0.275528	0.294229	0.0208021	0.125813	0.191019	1	0.287229	0.19562	0.757876
genus_Veillonella	1	0.619362	1	0.135914	0.346735	0.610861	0.483048	0.691869	1	0.723272	1	0.564656	1	0.485049	0.616662	1
